# Supplementary material for: Spatial niche construction of a consortium-based consolidated bioprocessing system
Source: Royal Society of Chemistry journal article supplement (doi:10.1039/d2gc01850k), 2022-01-01
Supplement: d2gc01850k1.pdf [file d2gc01850k1.pdf]

**Supplementary Materials for**  
**Spatial Niche Construction for Consortium-based Consolidated**  
**Bioprocessing System**

Hao Gao, Minhui Li, Lu Yang, Yujia Jiang, Wankui Jiang, Ziyi Yu,

Wenming Zhang\*, Fengxue Xin\*, Min Jiang

College of Biotechnology and Pharmaceutical Engineering,

State Key Laboratory of Materials-Oriented Chemical Engineering,

Nanjing Tech University, Nanjing, 211816, P.R. China

Jiangsu National Synergetic Innovation Center for Advanced Materials (SICAM),

Nanjing Tech University, Nanjing, 211816, P.R. China

College of Chemical Engineering, State Key Laboratory of Materials-Oriented

Chemical Engineering, Nanjing Tech University, Nanjing, 211816, P.R. China

\*Corresponding authors at: State Key Laboratory of Materials-Oriented Chemical Engineering, College of Biotechnology and Pharmaceutical Engineering, Nanjing Tech University, Puzhu South Road 30#, Nanjing 211800, P. R. China.

E-mail addresses: xinfengxue@njtech.edu.cn (F. Xin), [zhangwm@njtech.edu.cn](mailto:zhangwm@njtech.edu.cn) (W. Zhang)

## Supplementary Text

### Strain and Media

*S. cerevisiae* BY4741 was cultivated in medium containing (in g liter<sup>-1</sup>): KH<sub>2</sub>PO<sub>4</sub>, 3; (NH<sub>4</sub>)<sub>2</sub>SO<sub>4</sub>, 5; MgSO<sub>4</sub>·7H<sub>2</sub>O, 0.5; uracil, 0.15; and trace element stock, 1 mL liter<sup>-1</sup>. The trace element stock containing (in g liter<sup>-1</sup>): EDTA, 15; ZnSO<sub>4</sub>·7H<sub>2</sub>O, 4.5; CoCl<sub>2</sub>·6H<sub>2</sub>O, 0.3; MnCl<sub>2</sub>·4H<sub>2</sub>O, 1; CuSO<sub>4</sub>·5H<sub>2</sub>O, 0.3; CaCl<sub>2</sub>·2H<sub>2</sub>O, 4.5; FeSO<sub>4</sub>·7H<sub>2</sub>O, 3; NaMoO<sub>4</sub>·2H<sub>2</sub>O, 0.4; H<sub>3</sub>BO<sub>3</sub>, 1; KI, 0.1; and glucose, 40. And the filter-sterilized vitamin solution was added medium (10 mL) in 50 mL serum bottle sterilized by high temperature steam. The final vitamin containing (in mg liter<sup>-1</sup>): biotin, 0.05; calcium pantothenate, 1; nicotinic, 1; inositol, 25; thiamine HCl, 1; pyridoxine HCl, 1 and para-aminobenzoic acid, 0.2.

In the coculturing process, *T. asperellum* and *S. cerevisiae* BY4741 were cultivated in medium containing (in g liter<sup>-1</sup>): microcrystalline cellulose, 40; urea, 0.3; peptone, 0.75; (NH<sub>4</sub>)<sub>2</sub>SO<sub>4</sub>, 1.4; KH<sub>2</sub>PO<sub>4</sub>, 2; MgSO<sub>4</sub>·7H<sub>2</sub>O, 0.3; yeast extract, 0.25; CaCl<sub>2</sub>, 0.35; and trace element stock, 1 mL liter<sup>-1</sup>. The trace element stock containing (in g liter<sup>-1</sup>): FeSO<sub>4</sub>·7H<sub>2</sub>O, 5; MnSO<sub>4</sub>·4H<sub>2</sub>O, 1.6; ZnSO<sub>4</sub>·7H<sub>2</sub>O, 1.4; and CoCl<sub>2</sub>·6H<sub>2</sub>O, 20. And the filter-sterilized vitamin solution was added medium (10 mL) in 50 mL serum bottle sterilized by high temperature steam. The final vitamin containing (in mg liter<sup>-1</sup>): biotin, 0.05; calcium pantothenate, 1; nicotinic, 1; inositol, 25; thiamine HCl, 1; pyridoxine HCl, 1 and para-aminobenzoic acid, 0.2.

*L. paracasei* was cultivated in medium containing (in g liter<sup>-1</sup>): peptone, 10; beef extract, 0.75; yeast extract, 4; glucose, 20; tween 80, 0.3; sodium acetate, 5; ammonium citrate, 2; K<sub>3</sub>PO<sub>4</sub>, 2; MnSO<sub>4</sub>, 0.05; and MgSO<sub>4</sub>, 0.2.

In the coculturing process, *T. asperellum* and *L. paracasei* were cultivated in medium containing (in g liter<sup>-1</sup>): microcrystalline cellulose, 40; urea, 0.3; peptone, 0.75; (NH<sub>4</sub>)<sub>2</sub>SO<sub>4</sub>, 1.4; KH<sub>2</sub>PO<sub>4</sub>, 2; MgSO<sub>4</sub>·7H<sub>2</sub>O, 0.3; yeast extract, 0.25; CaCl<sub>2</sub>, 0.35; and trace element stock, 1 mL liter<sup>-1</sup>. The trace element stock containing (in g liter<sup>-1</sup>): FeSO<sub>4</sub>·7H<sub>2</sub>O, 5; MnSO<sub>4</sub>·4H<sub>2</sub>O, 1.6; ZnSO<sub>4</sub>·7H<sub>2</sub>O, 1.4; and CoCl<sub>2</sub>·6H<sub>2</sub>O, 20.

*Chlorella* sp. GY-H4 was cultivated in BG-11 medium containing (in g liter<sup>-1</sup>): citric acid, 6.0; ferric ammonium citrate, 6.0; EDTA, 1; NaNO<sub>3</sub>, 1.5; K<sub>2</sub>HPO<sub>4</sub>·2H<sub>2</sub>O, 0.051; MgSO<sub>4</sub>·7H<sub>2</sub>O, 0.075; CaCl<sub>2</sub> 0.024; Na<sub>2</sub>CO<sub>3</sub>, 0.02; A5 trace mineral solution 1 mL liter<sup>-1</sup>. The A5 trace mineral solution containing (in mg liter<sup>-1</sup>): H<sub>3</sub>BO<sub>4</sub>, 2.86; MnCl<sub>2</sub>·4H<sub>2</sub>O, 1.81; ZnSO<sub>4</sub>·7H<sub>2</sub>O, 0.222; Na<sub>2</sub>MoO<sub>4</sub>·2H<sub>2</sub>O, 0.391; CuSO<sub>4</sub>·5H<sub>2</sub>O, 0.079; and Co(NO<sub>3</sub>)<sub>2</sub>·6H<sub>2</sub>O, 0.049.

### **Construction of *T. asperellum* and *L. paracasei***

For the CBP consortium, *T. asperellum* were cultivated was first inoculated under aerobic conditions in 3D printed bioreactor for 48 hours. Then, the hydrogel-based living materials containing *L. paracasei* were then inoculated. During the fermentation process, concentrations of lactic in the sample was determined. Each experiment was performed in triplicates.

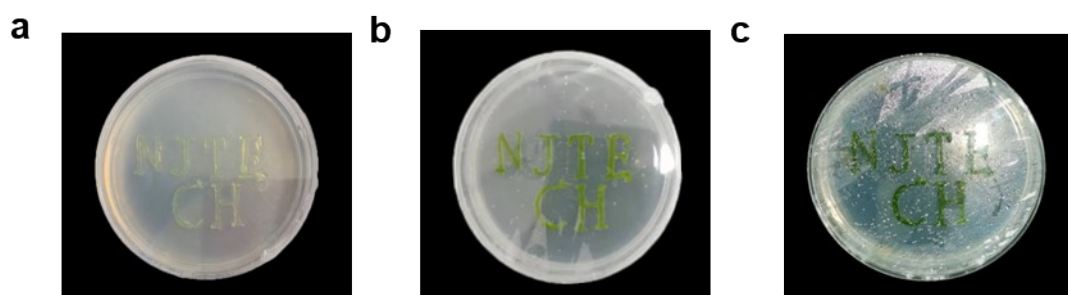

**Figure S1. Biocompatibility characterization of living materials containing *Chlorella* sp. GY-H4.** (a-c) Photographs of living materials containing *Chlorella* sp. GY-H4 printed directly onto agar tablet on the first, third and seventh days, respectively.

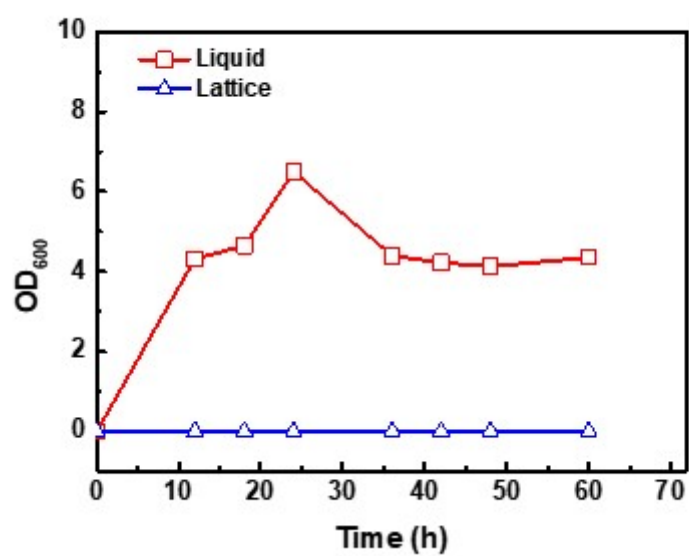

**Figure S2. Comparison of OD<sub>600</sub> curves with liquid culture and yeast-laden lattice hydrogel-based living materials.**

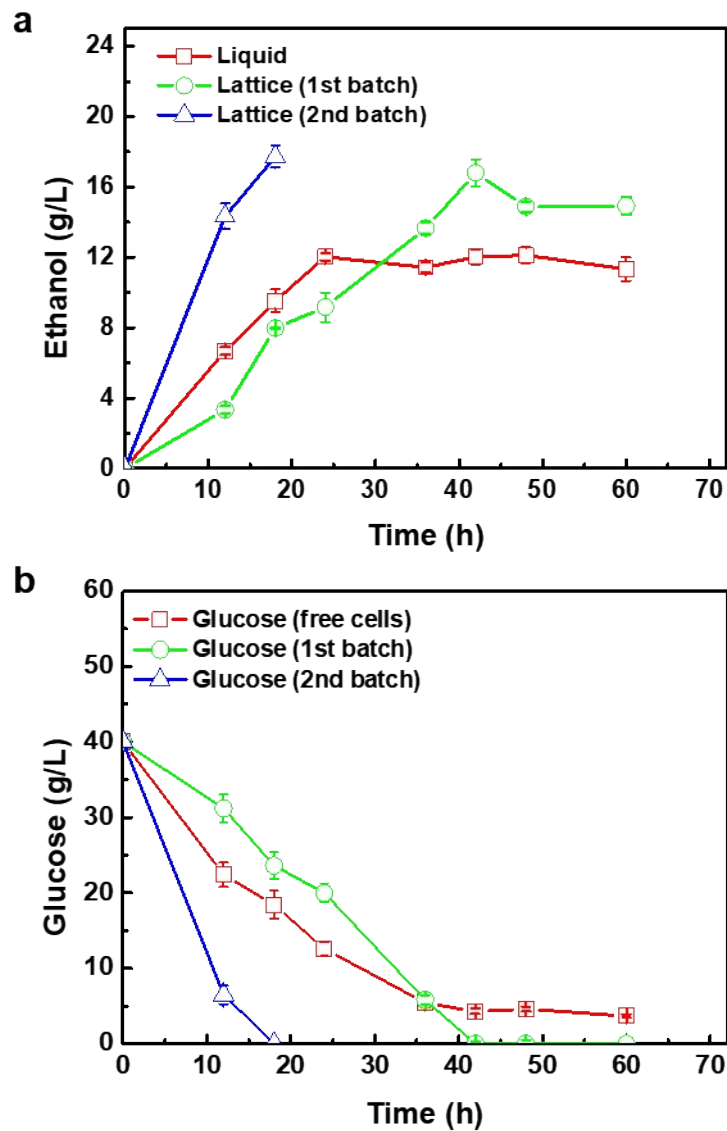

**Figure S3. The performance of ethanol production and glucose consumption by using liquid culture, first batch and second batch of living materials. (a)** Comparison of ethanol titer with by using liquid culture, first batch and second batch of living materials, **(b)** Comparison of glucose consumption by using liquid culture, first batch and second batch of living materials.

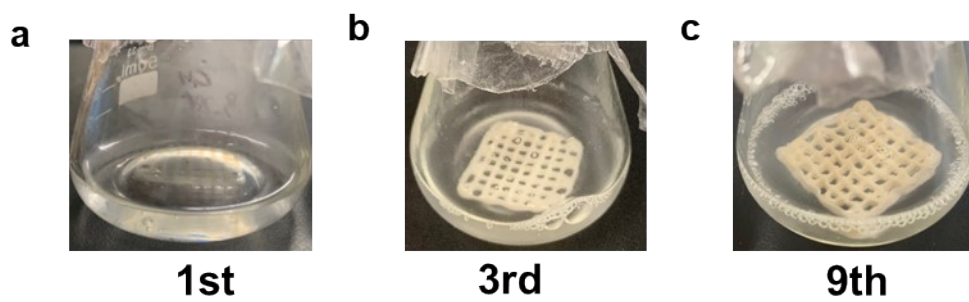

**Figure S4. Photographs of living materials after 1<sup>st</sup>, 3<sup>rd</sup>, 9<sup>th</sup> batch fermentation.**

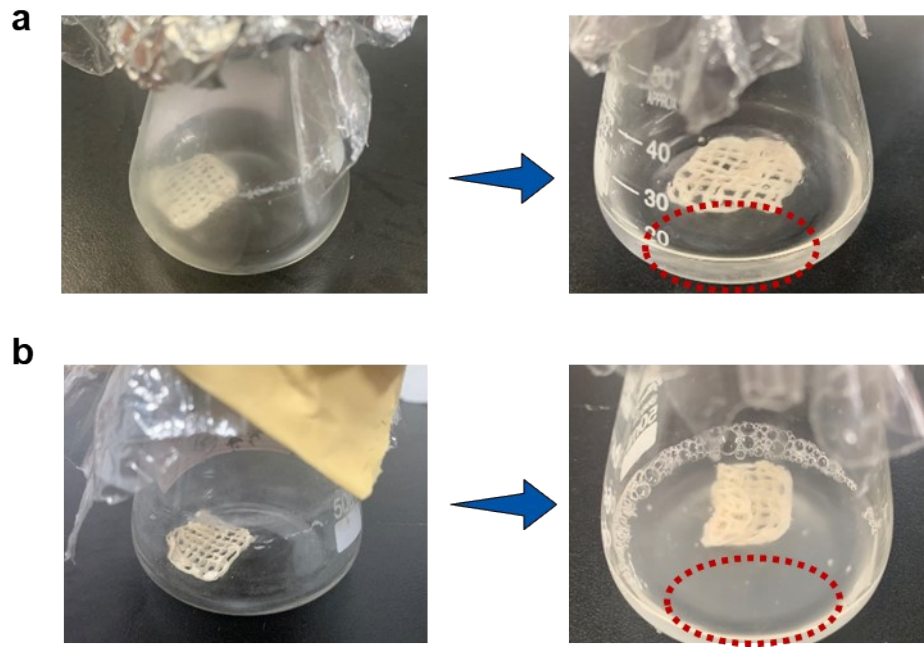

**Figure S5. Preservation methods of living materials containing *S. cerevisiae* BY4741 under different conditions.** (a) Photographs of living materials preserved by cold stage at 4°C, (b) Photographs of living materials preserved by lyophilization.

=

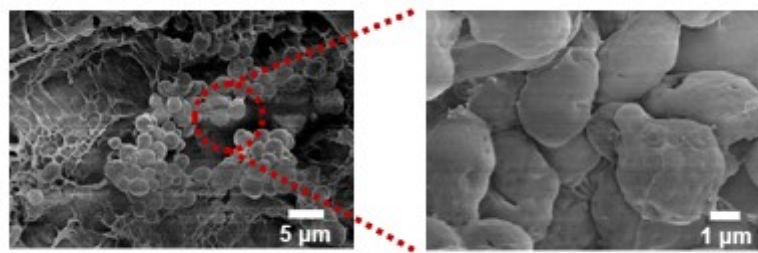

**Figure S6. SEM analysis of living materials containing *S. cerevisiae* BY4741 after fermentation.**

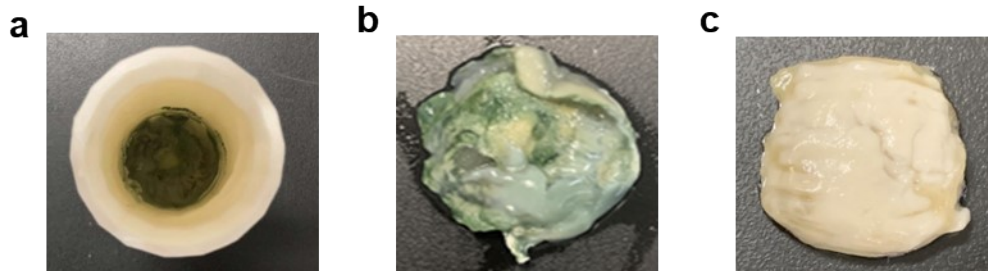

**Figure S7. Photographs of biofilm of *T. asperellum*.** (a, b) Photographs of biofilm of *T. asperellum* on 3D printed device surface, (c) Photograph of biofilm of *T. asperellum* on living materials surface.
